# Supplementary material for: Predicting malignancy in thyroid nodules: feasibility of a predictive model integrating clinical, biochemical, and ultrasound characteristics
Source: PubMed Central journal article supplement (PMC4910190; doi:10.1186/s13044-016-0033-y), 2016-05-25
Supplement: 13044_2016_33_MOESM1_ESM.pdf [file 13044_2016_33_MOESM1_ESM.pdf]

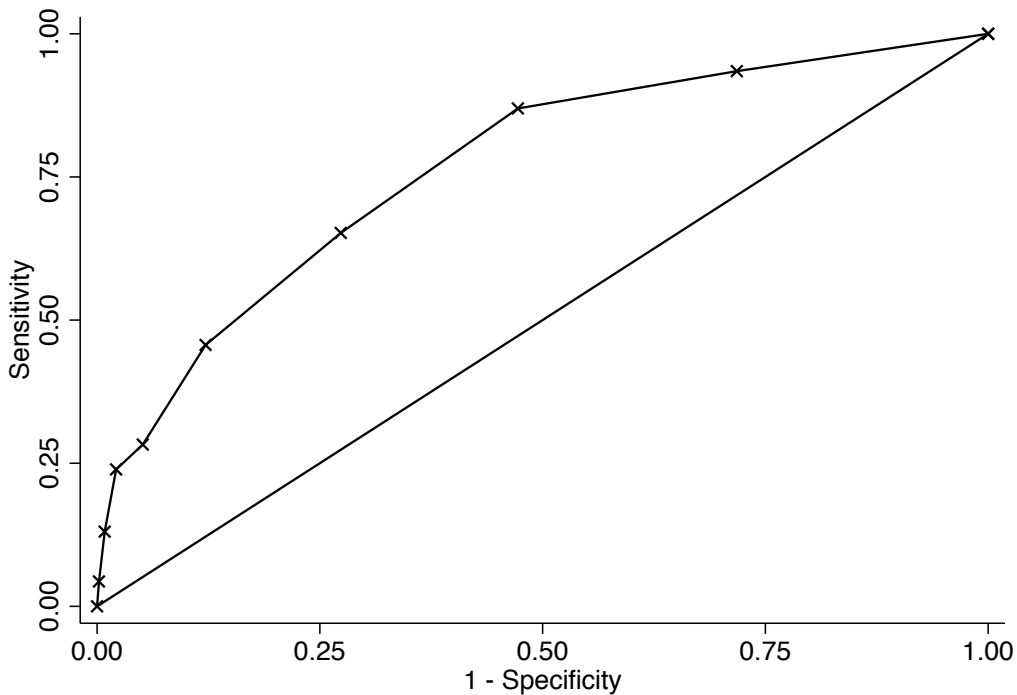

Area under ROC curve = 0.7667
